# Supplementary material
Source: HighWire-hosted journal article supplement (https://bmjopen.bmj.com/content/13/11/e070996)
Supplement: inline-supplementary-material-1 [file inline-supplementary-material-1.pdf]

**Supplementary Table 1: Studies of Lifestyle, Country of Origin and Non-Communicable Disease outcomes in Mid-Twentieth Century Australia**

| Authors                            | Journal and Year               | Brief Summary of Findings                                                                                                                                                                             |
|------------------------------------|--------------------------------|-------------------------------------------------------------------------------------------------------------------------------------------------------------------------------------------------------|
| Lovell and Prineas <sup>50</sup>   | Med J Aust, 1974               | Differences in blood pressure and prevalence of hypertension between Australians and Italians born in Melbourne                                                                                       |
| Ulman and Abernethy <sup>51</sup>  | Int J Epidemiol, 1975          | Australian National Blood Pressure Study showing lower blood pressure in Italians compared with Australians, age-adjusted rates of rise suggest environmental exposure                                |
| Dwyer and Hetzel <sup>7</sup>      | Int J Epidemiol, 1980          | Sharp declines in mortality from 1966 in Australia and 1968 in USA with persistent increase in UK, findings do correlate to some extent with changes in diet and smoking                              |
| Mc Michael et al. <sup>54</sup>    | Int J Cancer, 1980             | All seven migrant source countries in 1970 had higher rates of stomach cancer than Australians, discussed with reference to inter-country dietary differences                                         |
| Armstrong et al. <sup>53</sup>     | Am J Epidemiol, 1983           | Mortality from Ischemic Heart Disease in Italians in Italy and Migrants 1/3 to 2/3 that of native-born Australians                                                                                    |
| Burvill et al. <sup>58</sup>       | Soc Sci Med, 1983              | Suicide rates in migrants from England & Wales, Scotland and Ireland similar, although greater than in country of origin, especially Ireland                                                          |
| Mc Michael and Giles <sup>55</sup> | Cancer Research, 1988          | Review of cancers in migrants to Australia, suggesting strong evidence of environmental and behavioural influences                                                                                    |
| Mc Michael <sup>59</sup>           | Community Health Studies, 1989 | Asserts that coronary heart disease is a mass disease of 20 <sup>th</sup> century industrialised society requiring population based prevention strategies                                             |
| Hetzel et al. <sup>9</sup>         | J Clin Epi, 1989               | Review of epidemiological and experimental studies related to fall in sudden deaths in USA and Australia since 1967 concludes that there is a protective effect of dietary polyunsaturated fats       |
| Mc Michael et al. <sup>56</sup>    | Med J Aust, 1989               | South Australia Cancer Registry data 1977-1986 show British and Irish migrants had higher incidence of all cancer sites combined, whereas Southern Europeans had lower rates                          |
| Ireland and Giles <sup>52</sup>    | Aust NZ J Med, 1996            | Melbourne Collaborative Cohort Study 1990-1994, blood pressure higher in Italian-born middle-aged relative to Australian-born, not attributable to changes in diagnosis and treatment of hypertension |
